# Supplementary material
Source: Springer Nature journal article supplement (https://www.springermedizin.de/resource/supplementary/12906_2013_1595_MOESM4_ESM.pdf/9522334)

Fold of change

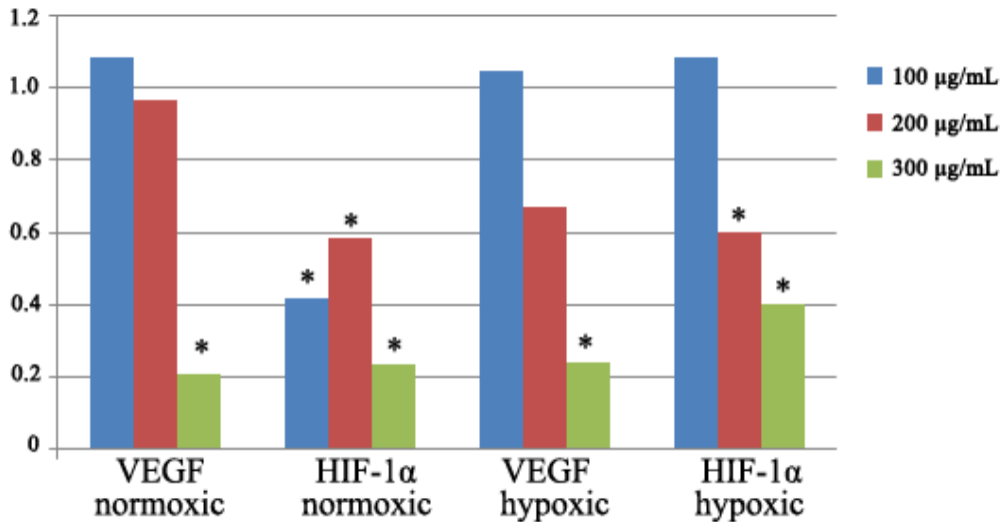

Supplement: MOESM4 [file 9522334]
